# Supplementary material for: Cytosine-5 RNA Methylation Regulates Neural Stem Cell Differentiation and Motility
Source: PubMed Central journal article supplement (PMC5233436; doi:10.1016/j.stemcr.2016.11.014), 2016-12-29
Supplement: mmc1.pdf [file mmc1.pdf]

**Stem Cell Reports, Volume 8**

**Supplemental Information**

**Cytosine-5 RNA Methylation Regulates Neural Stem Cell Differentiation  
and Motility**

**Joana V. Flores, Lucía Cordero-Espinoza, Feride Oeztuerk-Winder, Amanda  
Andersson-Rolf, Tommaso Selmi, Sandra Blanco, Jignesh Tailor, Sabine  
Dietmann, and Michaela Frye**

Figure S1, Related to Figure 2

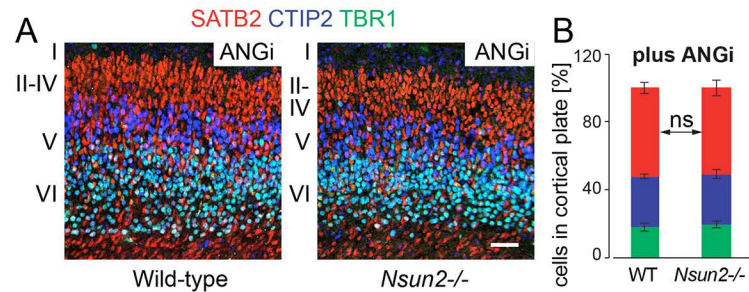

**Supplementary Figure 1.** (A) Cortical section of wild-type (WT) and *Nsun2*<sup>-/-</sup><sup>D014D11</sup> mouse brains at E18.5 treated with angiogenesis inhibitor (Angi). The layers are labeled for markers for layer VI (TBR1), layer V (CTIP2) and layer IV (SATB2). (B) Quantification of (A) showing no statistically significant difference in populations in the cortical plate in wild-type versus *Nsun2*<sup>-/-</sup> brains. Data represent mean  $\pm$  sd. (n=3 mice per genotype). Significance was assessed using student's t-test. Ns: Not significant. Scale bar: 50  $\mu$ m.

Figure S2, Related to Figure 5

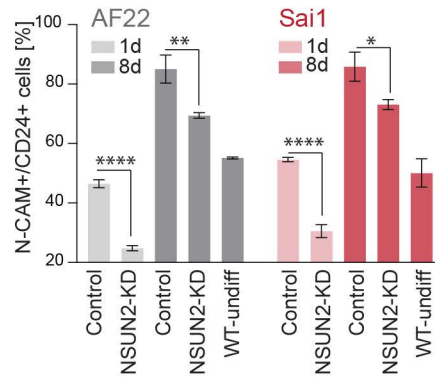

**Supplementary Figure 2.** Percentage of N-CAM and CD24 double-positive AF22 and Sai1 cells after 1 day (1d) and 8 days (8d) induction to differentiate (see Fig. 5E). The cells were transfected with scrambled control siRNA (control) or NSUN2 siRNAs (NSUN2-KD). As control undifferentiated wild-type cells for 8 days in culture were measured (WT-undiff). Data represent mean  $\pm$  sd. (n=3 experiments per condition). Significance was assessed using student's t-test. \*\*\*\* p<0.0001; \*\* p=0.0049; \* p=0.0132.
